# Supplementary material
Source: Springer Nature journal article supplement (https://www.springermedizin.de/resource/supplementary/12889_2013_5531_MOESM2_ESM.pdf/9495356)
Supplement: MOESM2 [file 9495356]

**Table S2 Effect standard deviations for the random effects in the base model and the full model**

|           | <b>Base</b> | <b>Full</b> |
|-----------|-------------|-------------|
| clusterId | 0.2270      | 0.2732      |
| ethnicity | 0.7539      | 0.6825      |
| province  | < 0.001     | < 0.001     |
